# Supplementary material for: Single lithium-ion conducting poly(tetrafluorostyrene sulfonate) – polyether block copolymer electrolytes
Source: Royal Society of Chemistry journal article supplement (doi:10.1039/c6py01910b), 2016-12-13
Supplement: c6py01910b1.pdf [file c6py01910b1.pdf]

**Single lithium-ion conducting poly(tetrafluorostyrene  
sulfonate) – polyether block copolymer electrolytes**

**Zhecheng Shao and Patric Jannasch\***

Polymer & Materials Chemistry, Department of Chemistry, Lund University,  
P.O. Box 124, SE-221 00, Lund, Sweden.

\*patric.jannasch@chem.lu.se

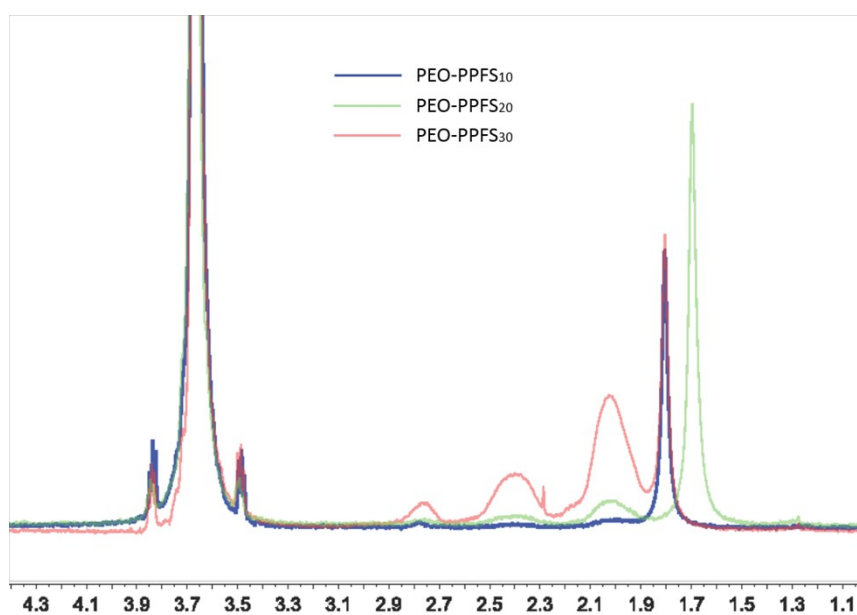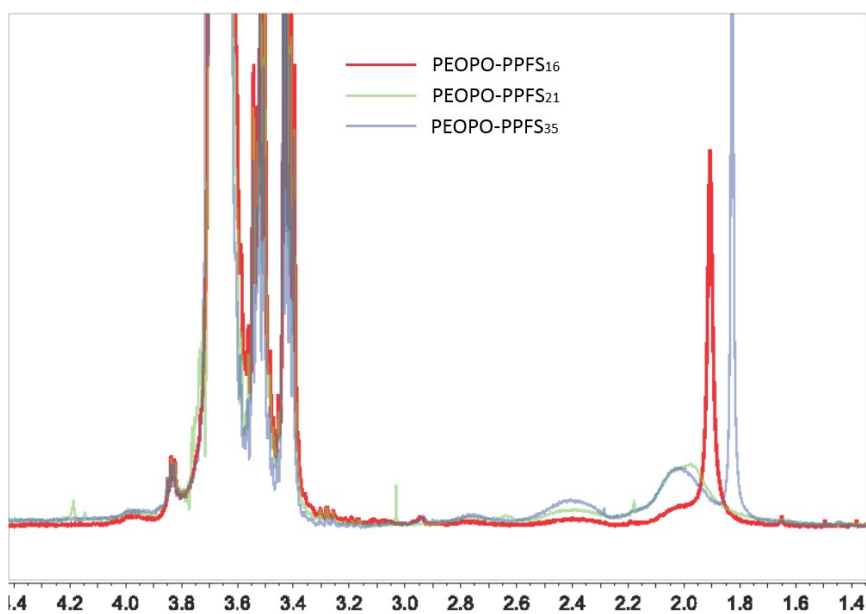

**Figure S1.**  $^1\text{H}$  NMR spectra of the PEO-PPFS $_x$  (upper) and PEOPO-PPFS $_x$  (lower) block copolymers.

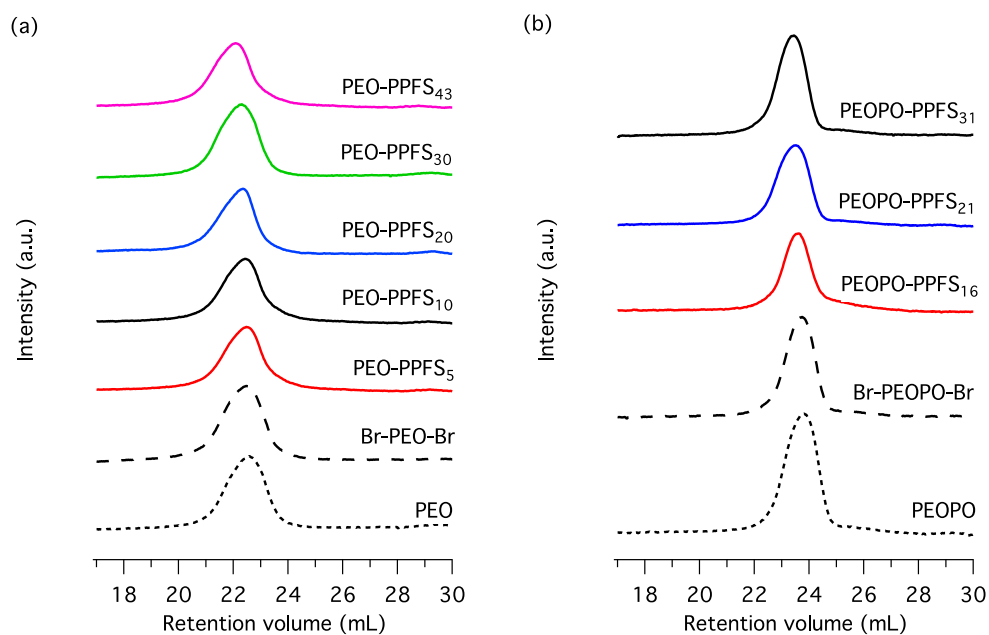

**Figure S2.** SEC chromatograms of the non-ionic precursor homopolymers and block copolymers based on (a) PEO and (b) PEOPO, respectively.

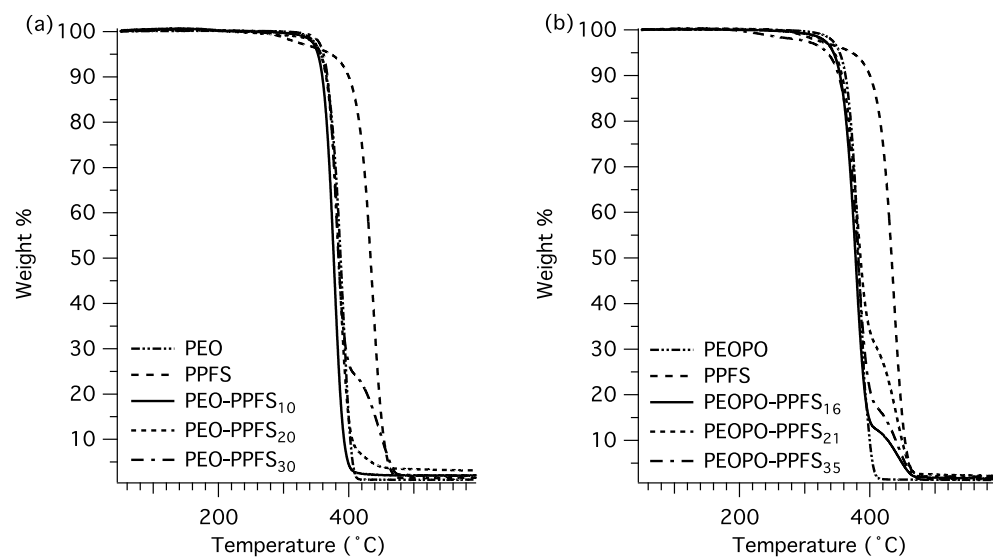

**Figure S3.** TGA traces of the non-ionic precursor homopolymers and block copolymers based on (a) PEO and (b) PEOPO, respectively.

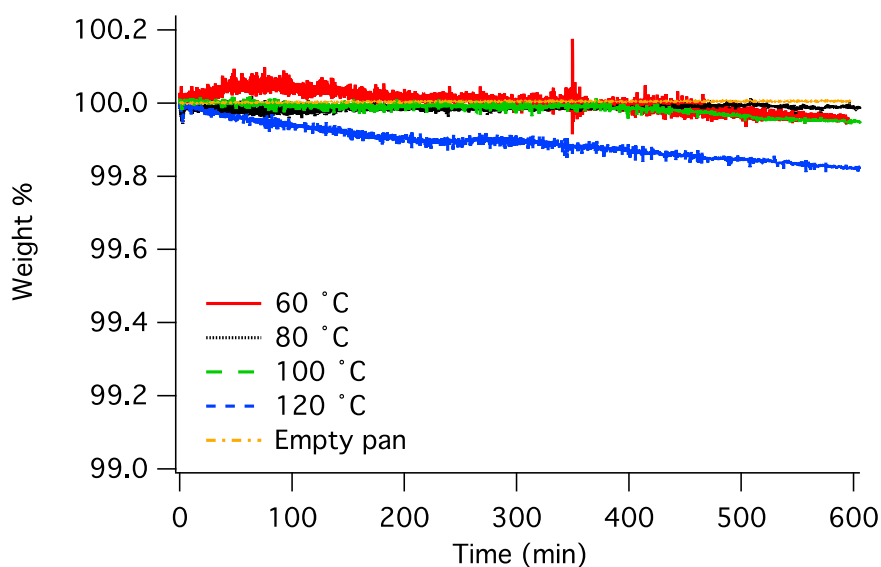

**Figure S4.** Isothermal TGA traces of sample PEO-sPPFSLi<sub>25</sub> under N<sub>2</sub> atmosphere. The maximum weight loss after 600 min. was 0.17% (at 120 °C).

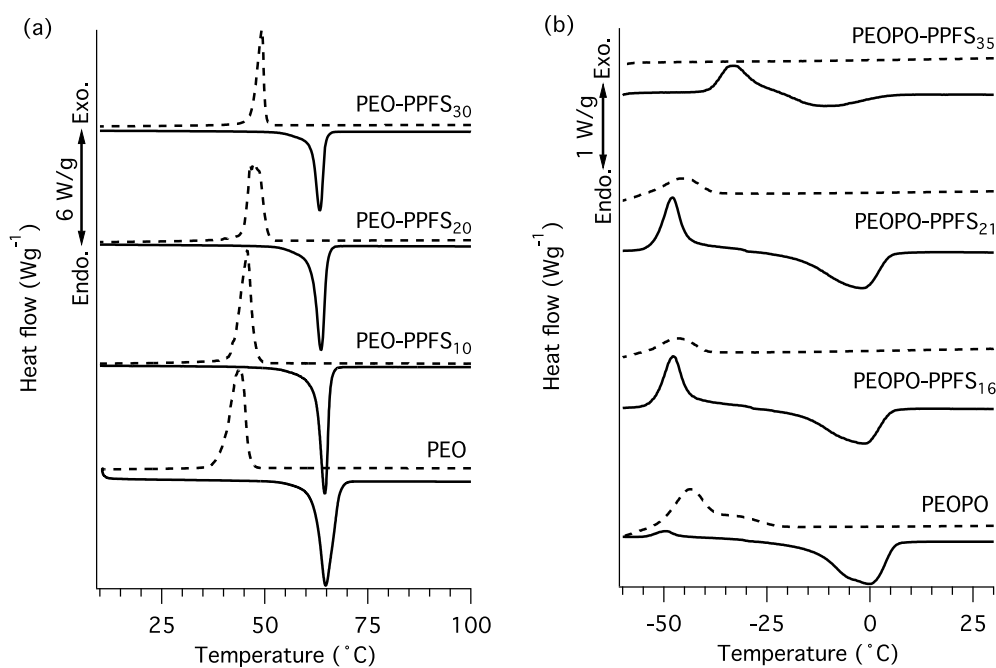

**Figure S5.** DSC cooling (dashed lines) and heating (solid lines) traces of the non-ionic precursor homopolymers and block copolymers based on (a) PEO and (b) PEOPO, respectively.

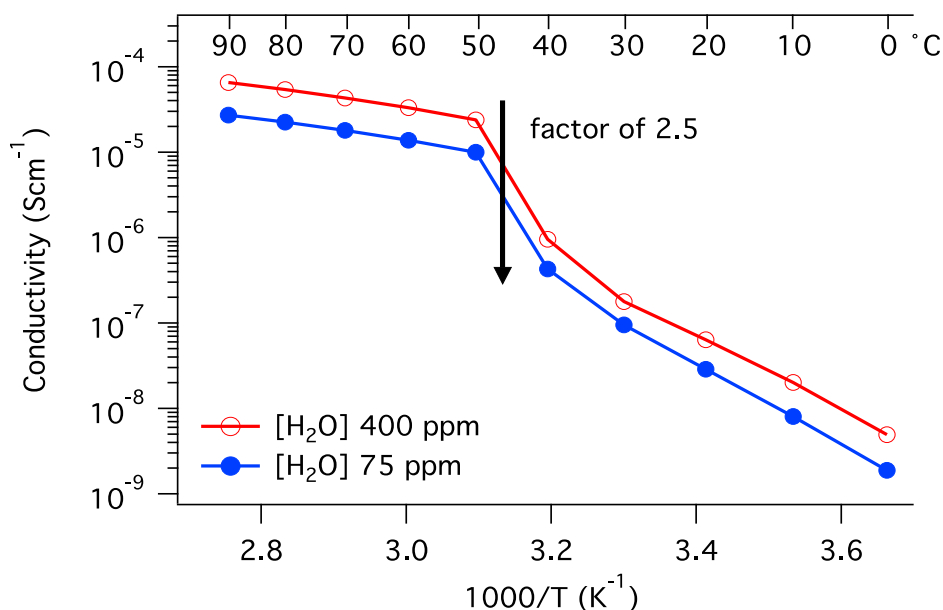

**Figure S6.** Conductivity of PEO-sPPFSLi<sub>25</sub> at two different water contents, as determined by Carl Fischer titrations. The conductivity decreased by a factor  $\sim 2.5$  above 50 °C when the water content was decreased from 400 ppm (dried under 2 Pa at 50 °C for 24 hours) to 75 ppm (dried under 0.2 Pa at 80 °C for 48 hours).

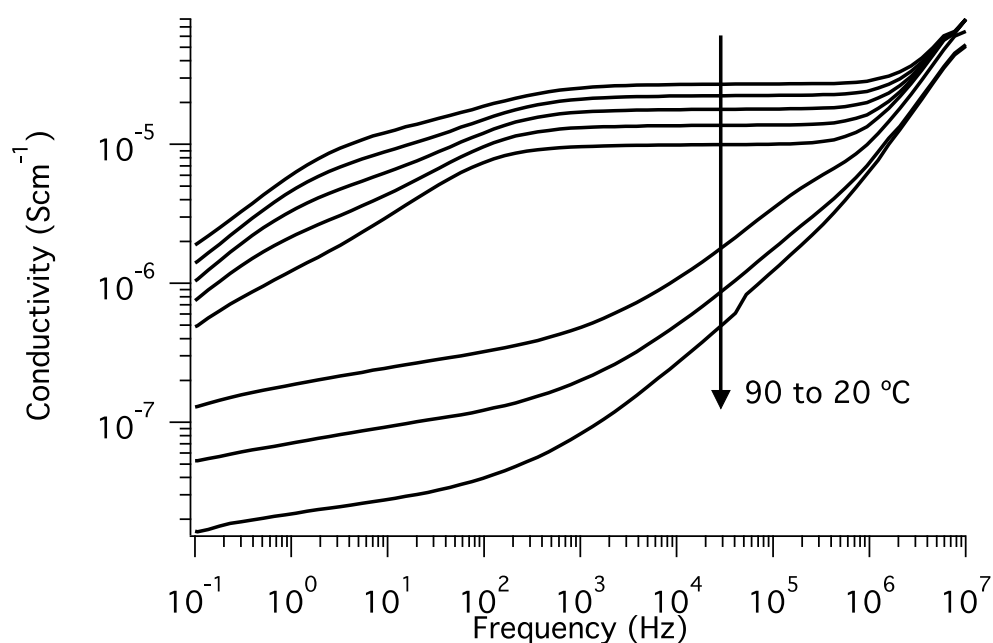

**Figure S7.** Measured AC conductivity versus frequency for sample PEO-sPPFSLi<sub>25</sub> obtained by electrochemical impedance spectroscopy from 90 to 20 °C in steps of 10 °C.

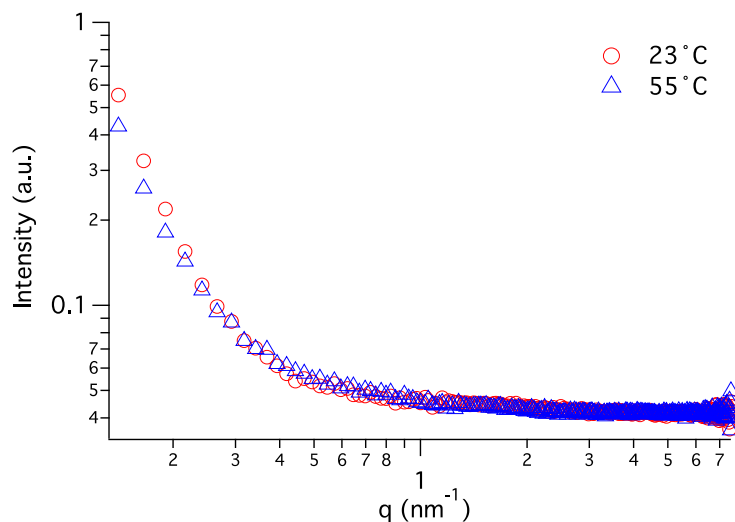

**Figure S8.** SAXS data of sample PEO-sPPFSLi<sub>25</sub> recorded above and below its  $T_m$  at 23 and 55 °C. The data showed no scattering peaks in the  $q$ -range between  $\sim 2$  and 7  $\text{nm}^{-1}$ , which corresponded to characteristic distances ( $d$ ) between  $\sim 1$  and 44 nm.

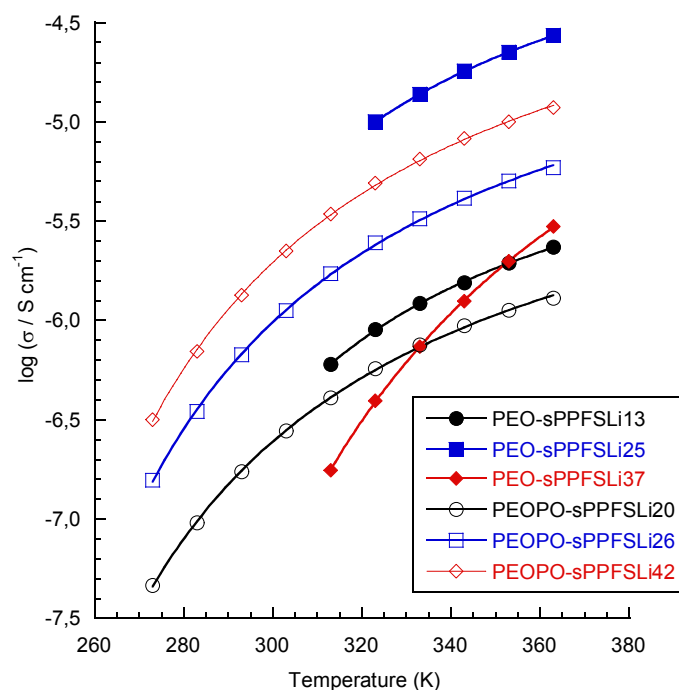

**Figure S9.** Measured conductivity data points and curves fitted to the VTF equation,  $\log \sigma = \log \sigma_0 - E_v/[R(T-T_v)]$ . For the PEO-containing samples, only data measured above the  $T_m$  of PEO was used in the fitting.
